# Supplementary material
Source: PubMed Central journal article supplement (PMC8538886)
Supplement: NIHMS1746511-supplement-1.pdf [file NIHMS1746511-supplement-1.pdf]

**Supplemental Table 1. Hazard Ratios (HRs) for Post-Discharge Outcomes *Before* Propensity Score Matching**

| <i>Outcome</i>                  | <i>Discharge to HHC</i> |              | <i>HR (HHC vs. No HHC*)</i><br>95% Confidence Intervals** |
|---------------------------------|-------------------------|--------------|-----------------------------------------------------------|
|                                 | No = 62,834             | Yes = 32,697 |                                                           |
| <b>30-Days</b>                  |                         |              |                                                           |
| All-cause readmission           | 17.2%                   | 22.3%        | 1.39 (1.35, 1.44)                                         |
| HF-readmission                  | 6.5%                    | 8.3%         | 1.47 (1.41, 1.54)                                         |
| All-cause Mortality             | 2.5%                    | 4.9%         | 1.97 (1.81, 2.14)                                         |
| All-cause Mortality/Readmission | 18.3%                   | 24.6%        | 1.39 (1.35, 1.44)                                         |
| <b>90-Days</b>                  |                         |              |                                                           |
| All-cause readmission           | 32.4%                   | 40.0%        | 1.37 (1.33, 1.40)                                         |
| HF-readmission                  | 13.3%                   | 16.2%        | 1.41 (1.36, 1.46)                                         |
| All-cause Mortality             | 7.9%                    | 13.2%        | 1.73 (1.65, 1.81)                                         |
| All-cause Mortality/Readmission | 38.9%                   | 44.3%        | 1.37 (1.33, 1.40)                                         |

*Abbreviations: HR: Hazard Ratio; HHC: Home health care;*

*\* reference group is No HHC*

*\*\* all  $p < 0.0001$*
